# Supplementary material for: The Development of a Web-Based, Patient-Centered Intervention for Patients With Chronic Myeloid Leukemia (CMyLife): Design Thinking Development Approach
Source: PubMed Central journal article supplement (PMC7260663; doi:10.2196/15895), 2020-05-15
Supplement: jmir_v22i5e15895_app2.pdf [file jmir_v22i5e15895_app2.pdf]

## Interview guide focus group hematologists.

This meeting explores your experiences with CMyLife and is divided in 4 parts:

1. Short introduction.
2. Knowledge of CMyLife.
3. Practical use of CMyLife.
4. The added value for the patient.

### 1. Short introduction

Before we start discussing the different features of CMyLife, we would like to hear your opinion of CMyLife as a whole: the sum total of features.

- What is your overall impression/opinion of CMyLife (for instance: positive/negative, useful/useless, fast/time consuming, etcetera)?

### 2. Knowledge of CMyLife

- How did you find out about CMyLife?
- Did you receive any explanation regarding the system?
- Do you know how CMyLife works?
- Do you know how CMyLife looks like?

### 3. Practical use of CMyLife

- Have patients been receptive to use CMyLife in the daily practice? If so/not, why?
- What do you think the barriers are in using CMyLife and in the efficacy of CMyLife in daily practice?
  - o Not knowing how to you use/apply eHealth
  - o Having doubts on the concept of eHealth/the content of CMyLife
  - o Lack of time
  - o Lack of convenience
  - o Fear of poor privacy regulations
  - o Missing connections with existing Radboud/other systems
- What do you think are positive factors regarding CMyLife?
  - o Usability (speed etcetera)
  - o Adapt/apply eHealth to own needs and desires.

### *Content*

- What is your opinion regarding the content of CMyLife?
- Do you think information is missing?
- Have all the different parts of the care process been discussed sufficiently?

### *Lay-out*

- What do you think of the way the information is displayed? (*each feature*)
- What's your opinion on the ease of retrieving information?
- What do you think of the readability of the information?
- How do you like the interface's lay-out?

*Functionality*

- What do you think of the speed of the system?
- What is your opinion on the usability of the system?
- What do you think of the possibility to personalize settings?

4. Added value for you as a patient

One of the goals of CMyLife is to provide more accessible, reliable and understandable information, which fits the personal situation of your patient.

- Do you think we have achieved this goal with CMyLife? If not, what could help us to achieve this goal?
- Do you think the information provided by CMyLife is of added value to the information the patient already receives in the hospital?

Another goal of CMyLife is to personalize CML care.

- In your opinion, to what degree has CMyLife supported patients in self-management and having them take the lead in their own care process?
- In your opinion, to what extent are patients more involved in their own care process because of CMyLife?

Other remarks.

- Do you have any other remarks/suggestions concerning CMyLife?
- Thank you for your participation.
